# Supplementary material for: Gut Microbiome Response to Sucralose and Its Potential Role in Inducing Liver Inflammation in Mice
Source: PubMed Central journal article supplement (PMC5522834; doi:10.3389/fphys.2017.00487), 2017-07-24
Supplement: DataSheet1.pdf [file DataSheet1.pdf]

## *Supplementary Material*

# **Gut microbiome response to sucralose and its potential role in inducing liver inflammation in mice**

**Xiaoming Bian, Liang Chi, Bei Gao, Pengcheng Tu, and Kun Lu\***

\* **Correspondence:** Kun Lu: kunlu@unc.edu

## **1 Supplementary Tables and Figures**

### **1.1 Supplementary Tables**

**Supplementary Table 1.** Significantly altered fecal metabolites in sucralose-treated mice compared to controls.

| Identified metabolites                                                                                                                                                | Fold Change | p-value | m/z      | retention time | Matched fragment                   |
|-----------------------------------------------------------------------------------------------------------------------------------------------------------------------|-------------|---------|----------|----------------|------------------------------------|
| Quinolinic acid                                                                                                                                                       | 5.45        | 0.000   | 168.0287 | 8.1            | 66, 94                             |
| 2,3-Didehydro-pimeloyl-CoA                                                                                                                                            | 4.01        | 0.021   | 908.1711 | 11.1           | 136, 890                           |
| 3-(3-Ethyloxiranyl)-2-propenal                                                                                                                                        | 3.32        | 0.025   | 149.0582 | 10.9           | 77, 91, 149                        |
| N-Acetylhistidine                                                                                                                                                     | 3.06        | 0.000   | 236.0416 | 2.1            | 54, 60, 108, 110, 134, 180.        |
| 5,8,11,14-all-cis-tetracosanoylethanolamide/17,17-dimethyl-5,8,11,14-all-cis-docosatetraenoylethanolamide/(16,16-dimethyldocosa-cis-5,8,11,14-tetraenoyl)ethanolamine | 2.82        | 0.018   | 426.3371 | 17.8           | 44, 62                             |
| 2-Oxosuccinamate                                                                                                                                                      | 2.66        | 0.000   | 169.9847 | 2.0            | 58, 70, 96, 97                     |
| Ne,Ne dimethyllysine                                                                                                                                                  | 2.58        | 0.024   | 213.0984 | 1.5            | 84, 102, 110, 129, 139             |
| L-gamma-glutamyl-L-isoleucine                                                                                                                                         | 2.21        | 0.007   | 261.1453 | 8.5            | 56, 69, 84, 86, 102, 130, 198, 226 |
| L-gamma-glutamyl-L-leucine                                                                                                                                            | 2.21        | 0.007   | 261.1453 | 8.5            | 56, 69, 84, 86, 102, 130, 198, 226 |
| PG(18:4(6Z,9Z,12Z,15Z)/0:0)                                                                                                                                           | 2.15        | 0.047   | 505.2557 | 4.0            | 213, 231, 487                      |
| 2-aminomuconic acid                                                                                                                                                   | 2.09        | 0.001   | 158.0456 | 2.8            | 68, 85, 95, 98, 114, 122, 158      |
| L-prolyl-L-proline                                                                                                                                                    | 2.01        | 0.034   | 213.125  | 7.9            | 70, 98, 195                        |

|                                          |       |       |          |      |                                                                                          |
|------------------------------------------|-------|-------|----------|------|------------------------------------------------------------------------------------------|
| (all-Z)-7,10,13-Docosatrienoic acid      | 1.99  | 0.008 | 357.279  | 15.2 | 41, 55, 69, 83, 95, 135, 145, 147, 161, 175, 201, 215, 203, 233, 247, 275, 289, 339, 357 |
| L-Isoleucine/L-leucine                   | 1.94  | 0.001 | 132.1015 | 31.5 | 44, 86                                                                                   |
| Citrulline                               | 1.87  | 0.006 | 214.0568 | 2.1  | 43, 70, 86, 151                                                                          |
| N-oleoyl leucine                         | 1.87  | 0.012 | 396.3509 | 19.1 | 59, 69, 86, 125, 239, 247, 350, 396                                                      |
| N-oleoyl isoleucine                      | 1.87  | 0.012 | 396.3509 | 19.1 | 59, 69, 86, 125, 239, 247, 350, 396                                                      |
| N6-Acetyl-L-lysine                       | 1.76  | 0.008 | 189.1232 | 4.1  | 56, 84, 130                                                                              |
| LysoPE(0:0/14:0)                         | 1.75  | 0.036 | 426.2635 | 17.6 | 44, 62, 198, 285, 365                                                                    |
| L-Tryptophan                             | 1.71  | 0.009 | 205.0972 | 8.2  | 74, 91, 115, 118, 127, 130, 142, 143, 144, 146, 159, 170, 188                            |
| L-Tyrosine                               | 1.62  | 0.000 | 182.0818 | 11.5 | 77, 91, 118, 123, 136                                                                    |
| 3-Oxo-4,6-choladienoic acid              | 1.52  | 0.030 | 371.256  | 12.4 | 55, 81, 107, 121, 133, 159, 173, 257, 269, 327, 353, 355, 371                            |
| Cinnamic acid                            | -1.53 | 0.032 | 149.0605 | 10.2 | 77, 103                                                                                  |
| 3 beta,7 alpha-Dihydroxy-5-cholestenoate | -1.54 | 0.002 | 455.3111 | 11.6 | 55, 123, 129, 131, 269, 313, 363, 375, 391, 409, 419, 437, 455                           |
| Acetylglutamine                          | -1.57 | 0.041 | 195.1217 | 2.2  | 41, 43, 55, 70, 82, 87, 109, 111, 122                                                    |
| Adenosine                                | -1.6  | 0.036 | 268.1037 | 4.4  | 57, 136                                                                                  |
| Palmitaldehyde                           | -1.6  | 0.006 | 263.237  | 18.1 | 43, 55, 69, 93, 119, 121, 127, 163, 245                                                  |
| Palmitelaidic acid                       | -1.67 | 0.021 | 255.2317 | 17.5 | 43, 55, 57, 69, 81, 83, 109, 137, 219                                                    |
| Pyridoxal                                | -1.72 | 0.005 | 168.0648 | 8.3  | 67, 77, 79, 94, 106, 122                                                                 |
| C17 Sphinganine                          | -1.83 | 0.040 | 288.2896 | 13.7 | 43, 57, 60, 71, 85, 99, 113, 155, 209, 240, 270                                          |
| N-(3-oxo-hexanoyl)-homoserine lactone    | -1.85 | 0.034 | 236.0897 | 4.7  | 43, 56, 84, 95, 102, 164, 178, 190, 236                                                  |

|                                                                                               |       |       |          |      |                                                                                               |
|-----------------------------------------------------------------------------------------------|-------|-------|----------|------|-----------------------------------------------------------------------------------------------|
| 3-Dehydrosphinganine                                                                          | -1.86 | 0.047 | 300.2902 | 14.0 | 41, 43, 55, 57, 60, 71, 85, 99, 127, 239, 264, 282, 300                                       |
| N,N-Dimethylsphingosine                                                                       | -1.9  | 0.015 | 328.321  | 15.2 | 44, 55, 57, 58, 67, 69, 81, 83, 95, 109, 280                                                  |
| Adenine                                                                                       | -1.97 | 0.025 | 136.0618 | 4.6  | 55, 65, 82, 92, 94, 109, 119, 136                                                             |
| Lithocholic acid<br>/isoallolithocholic acid<br>/allolithocholic acid/<br>isolithocholic acid | -2    | 0.027 | 399.2907 | 11.3 | 111, 123, 187, 193, 201, 255, 257, 275, 281, 283, 301, 313, 319, 333, 351, 363, 365, 381, 399 |
| Guanine                                                                                       | -2.02 | 0.002 | 152.0565 | 6.8  | 53, 57, 85, 158                                                                               |
| N-pentadecanoyl-L-Homoserine lactone                                                          | -2.03 | 0.010 | 364.226  | 18.2 | 57, 83, 85, 109, 308                                                                          |
| Nonadeca-10(Z)-enoic acid                                                                     | -2.04 | 0.036 | 297.278  | 31.2 | 41, 55, 57, 71, 85                                                                            |
| N-tetradecanoyl-L-Homoserine lactone                                                          | -2.05 | 0.035 | 350.2123 | 17.7 | 57, 83, 84, 85, 123                                                                           |
| L-Dopa                                                                                        | -2.05 | 0.000 | 198.0762 | 3.0  | 65, 77, 79, 107, 109, 135, 152                                                                |
| L-2,3-Dihydrodipicolinate                                                                     | -2.11 | 0.023 | 208.0023 | 2.2  | 118, 136, 144, 164, 208                                                                       |
| 2-Furoylglycine                                                                               | -2.11 | 0.023 | 208.0023 | 2.2  | 39, 95                                                                                        |
| 3-Dehydroquinate                                                                              | -2.17 | 0.006 | 191.0539 | 12.0 | 43, 117, 145, 173                                                                             |
| N(6)-Methyllysine                                                                             | -2.18 | 0.033 | 161.127  | 1.5  | 44, 58, 70, 84, 98, 115                                                                       |
| Kynurenic acid                                                                                | -2.25 | 0.006 | 190.0495 | 12.0 | 89, 116, 144                                                                                  |
| N-butanoyl-l-homoserine lactone                                                               | -2.35 | 0.000 | 172.0977 | 9.5  | 43, 56, 70, 84, 154                                                                           |
| 3a,7b,12a-Trihydroxyoxocholanyl-Glycine                                                       | -2.55 | 0.036 | 466.3139 | 12.6 | 69, 85, 448, 466                                                                              |
| Hydroxychlorobactene glucoside                                                                | -2.61 | 0.007 | 735.4571 | 11.2 | 237, 423, 499, 717                                                                            |
| Sterol                                                                                        | -2.92 | 0.016 | 271.2057 | 14.1 | 43, 187, 253, 243, 271                                                                        |
| N,N-dimethyl arachidonoyl amine                                                               | -2.95 | 0.038 | 332.2957 | 21.3 | 57, 105                                                                                       |
| DAT(16:0/23:0(2Me[S],3OH[S],4Me[S],6Me[S]))                                                   | -3.02 | 0.009 | 997.7105 | 10.3 | 163, 221, 795, 961                                                                            |
| PC(P-17:0/0:0)                                                                                | -3.42 | 0.041 | 494.3631 | 21.3 | 311, 494                                                                                      |
| LysoPC(14:1(9Z))                                                                              | -3.51 | 0.000 | 466.291  | 11.0 | 222, 258, 283, 448, 466                                                                       |
| PA(12:0/18:0)/PA(15:0/15:0)                                                                   | -3.96 | 0.019 | 659.4018 | 12.3 | 81, 339, 561                                                                                  |
| N-linoleoyl taurine                                                                           | -4.09 | 0.038 | 426.2039 | 26.9 | 57, 111, 126                                                                                  |

---

|                                                                   |       |       |          |      |                              |
|-------------------------------------------------------------------|-------|-------|----------|------|------------------------------|
| PA(13:0/20:5(5Z,8Z,11Z,14Z,17Z))/PA(20:5(5Z,8Z,11Z,14Z,17Z)/13:0) | -4.45 | 0.005 | 675.4003 | 11.8 | 577, 657                     |
| p-Hydroxyphenylacetic acid                                        | -4.63 | 0.010 | 153.055  | 11.0 | 57, 67, 77, 107              |
| (20R/S)-24-Hydroxygeminivitamin D4                                | -9.27 | 0.001 | 519.4065 | 12.5 | 139, 427, 443, 483, 501, 519 |

---

## 1.2 Supplementary Figures

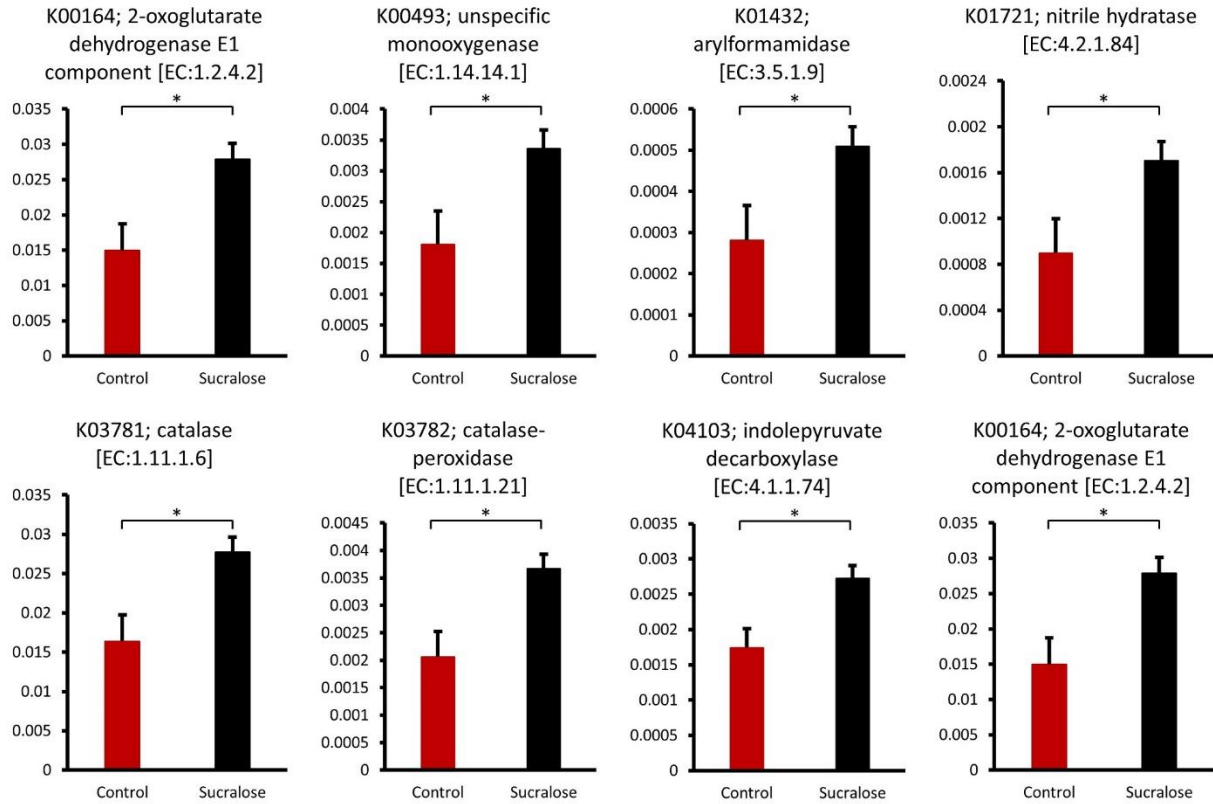

**Supplementary Figure 1.** Enrichment of bacterial genes related to tryptophan metabolism in the gut microbiome of sucralose-treated mice ( $*p < 0.05$ ).

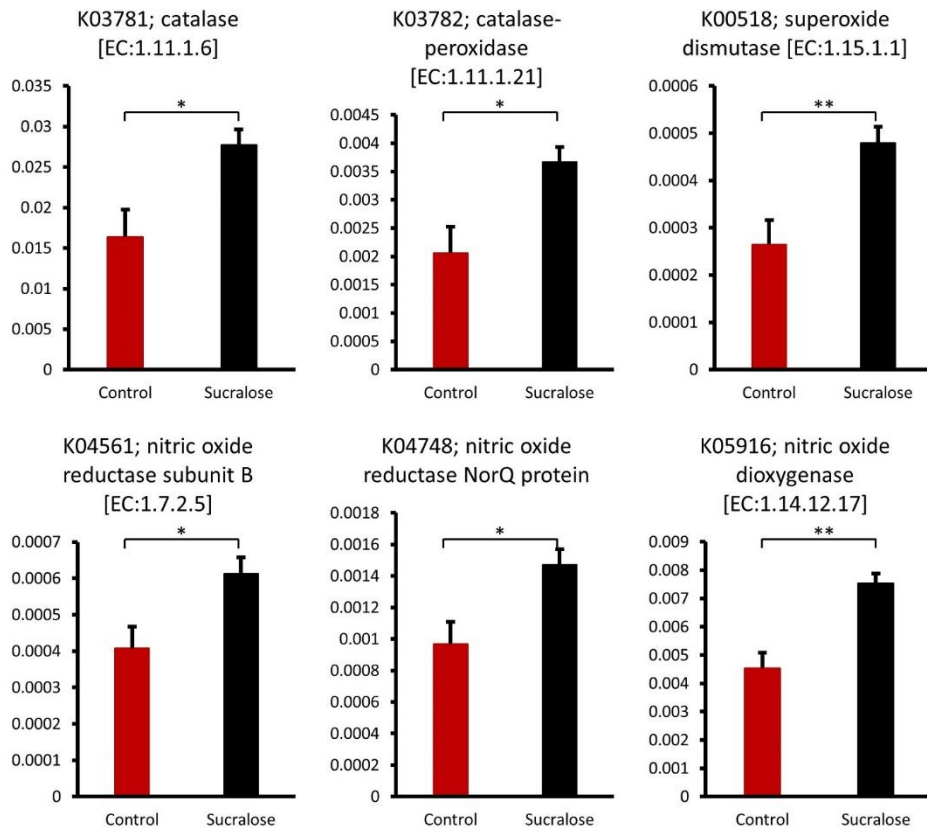

**Supplementary Figure 2.** Increase of bacterial genes of antioxidative enzymes in the gut microbiome of sucralose-treated mice (\*p<0.05, \*\*p<0.01)
